# Supplementary material for: Calibration methods to circumvent unknown component spectra for quantitative in situ Raman monitoring of co-polymerization reactions
Source: Royal Society of Chemistry journal article supplement (doi:10.1039/d0re00424c), 2020-12-30
Supplement: d0re00424c1.pdf [file d0re00424c1.pdf]

### Experimental Measurements

1. Perform inline Raman monitoring of styrene and butyl acrylate (St-BA) co-polymerisation. Each Raman spectrum in this time-series,  $\vec{r}_{1 \times v}^{mix}$ , measures a mixture of the three components, St, BA and co-polymer (Cp). For a particular reaction run,  $m$  number of reaction mixture spectra is collated into a spectral matrix  $R_{m \times v}$ .
2. Take hourly offline NMR measurements of St and BA for multivariate calibration using PLSR, MMRS, or BTEM-MLR. For each NMR measurement dataset used for calibration,  $C_{k \times s}^{cal}$ , its corresponding inline Raman spectral is  $R_{k \times v}^{cal}$ .
3. Measure the known Raman spectra of monomers St ( $\vec{r}_{1 \times v}^{St}$ ), and BA ( $\vec{r}_{1 \times v}^{BA}$ ) in the solvent 1,4 dioxane. This will be used in the MMSR calibration algorithm.

### PLSR Calibration

1. Respective NMR measurements of each monomer (St or BA),  $C_{k \times s}^{cal}$ , and its corresponding Raman calibration data,  $R_{k \times v}^{cal}$ , are entered into a PLSR software package (e.g. Unscrambler). <Eqs. 3a & 3b>
2. Latent variables,  $\hat{L}_{v \times s}$ , will be generated from the PLSR software (running NIPALS, SIMPLS or Kernel algorithms). Judiciously decide the number of latent variables to use for each monomer calibration. <Eq. 4>
3. Using the reaction monitored spectral data  $R_{m \times v}$ , the PLS software would estimate the concentrations of monomers,  $\hat{C}_{m \times s}$ . <Eq. 5>

### MMSR Calibration

1. MMSR utilizes a novel spectral residual minimization algorithm to achieve the optimal residual spectra,  $\hat{e}_{1 \times v}^{Cp}$ . <Eq. 8b>

2. The MMSR algorithm calculates towards optimal estimates of St and BA concentrations,  $\hat{C}_{St}^t$  and  $\hat{C}_{BA}^t$ , with positive concentration constraint to obtain minimized  $\hat{e}_{1 \times v}^{Cp}$  spectrum for each NMR calibration value. <Eq. 9>
3. The optimal residual spectra,  $\hat{e}_{1 \times v}^{Cp}$ , in this St-BA co-polymerisation corresponds to the co-polymer (Cp) spectra. <Eq. 10>
4. Using the hourly NMR offline St and BA monomer concentrations ( $\hat{C}_{St}^{NMR}$  and  $\hat{C}_{BA}^{NMR}$ ), the respective linear calibrations for  $\hat{C}_{St}^t$  and  $\hat{C}_{BA}^t$  obtained from MMSR can be validated by plotting  $\hat{C}_{St}^t$  and  $\hat{C}_{St}^{NMR}$  for St and  $\hat{C}_{BA}^t$  and  $\hat{C}_{BA}^{NMR}$  for BA. <Eqs. 11a & 11b>

### BTEM-MLR Calibration

1. Perform BTEM self-modeling multivariate curve resolution on  $R_{m \times v}$  to elucidate  $s$  number of significant component spectra corresponding to reactants, intermediates or products. For this work, St, BA and Cp spectra were reconstructed via BTEM.
2. Calculate the relative concentration,  $\hat{C}_{m \times s}^{rel}$ , by performing multi-linear regression (MLR) using the BTEM elucidated component spectra,  $\hat{r}_{s \times v}^{norm}$ , on the reaction Raman data  $R_{m \times v}$ . <Eq. 12>
3. For each significant Raman component with a series of measured offline calibration NMR concentration values in  $C_{k \times s}^{cal}$  (e.g. for styrene,  $\hat{C}_{St}^{NMR}$ ), perform a linear regression to estimate its slope and intercept values (e.g.  $m_{St}$  and  $y_{St}$ ) to correlate with MLR relative concentration (e.g.  $\hat{C}_{St}^{rel}$ ). Use this slope and intercept to obtain properly scaled chemical component inline concentrations (e.g.  $\hat{C}_{St}^t$ ). <Eq. 13>
